# Supplementary material
Source: HighWire-hosted journal article supplement (https://www.ajevonline.org/highwire/filestream/9690/field_highwire_adjunct_files/0/Supplemental_Data.pdf)
Supplement: Supplemental_Data.pdf [file Supplemental_Data.pdf]

## Supplemental Data for:

Keller M, Romero P, Gohil H, Smithyman RP, Riley WR, Casassa LF and Harbertson JF. 2016.

Deficit irrigation alters grapevine growth, physiology, and fruit microclimate.

Am J Enol Vitic 67:426-435. doi: 10.5344/ajev.2016.16032.

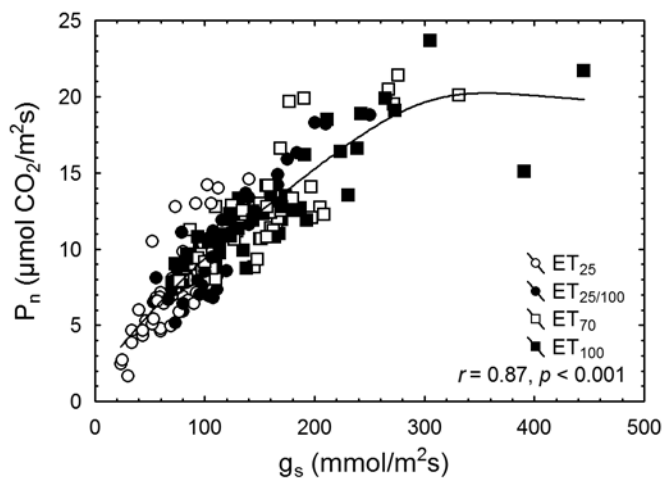

**Supplemental Figure 1** Correlation between stomatal conductance for water vapor ( $g_s$ ) and photosynthesis rate ( $P_n$ ) in field-grown Cabernet Sauvignon vines irrigated at various fractions of crop evapotranspiration (denoted by subscripts of  $ET_c$ ) from fruit set to harvest.  $ET_{25/100}$  refers to 25%  $ET_c$  before veraison and 100%  $ET_c$  thereafter. Data were pooled for 2011, 2012, and 2013 ( $n = 192$ ).

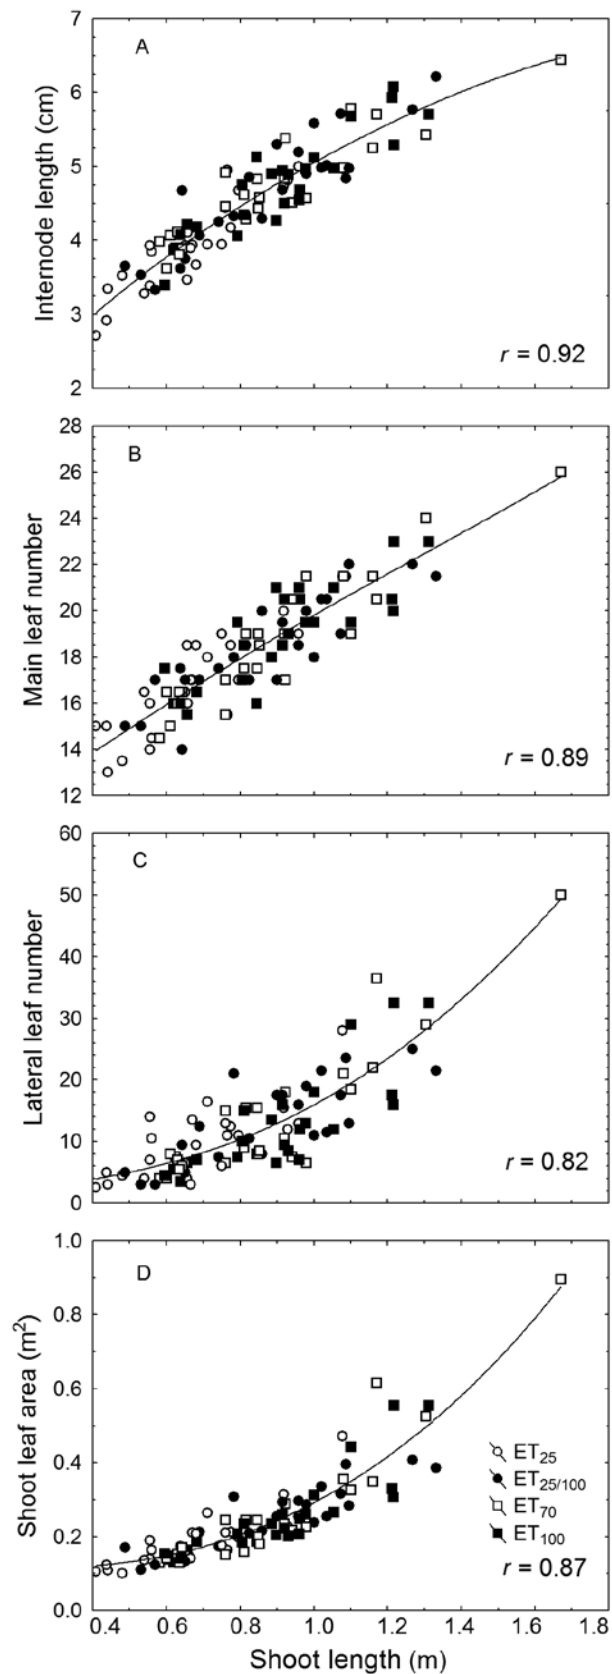

**Supplemental Figure 2** Correlation between main shoot length at fruit set and other indicators of shoot vigor in field-grown Cabernet Sauvignon vines irrigated at various fractions of crop evapotranspiration (denoted by subscripts of  $ET_c$ ) from fruit set to harvest.  $ET_{25/100}$  refers to 25%  $ET_c$  before veraison and 100%  $ET_c$  thereafter. Data were pooled for 2011, 2012, and 2013 (all  $p < 0.001$ ,  $n = 96$ ).
